# Supplementary material for: Simple Fabrication of Solid-State Nanopores on a Carbon Film
Source: MDPI journal article supplement (doi:10.3390/mi12091135), 2021-09-21
Supplement: s1 [file s1]

# Supplementary Materials: Simple Fabrication of Solid-state Nanopores Using A Commercially Available Material

Natsumi Takai, Kan Shoji, Tei Maki and Ryuji Kawano

**Figure(s):**

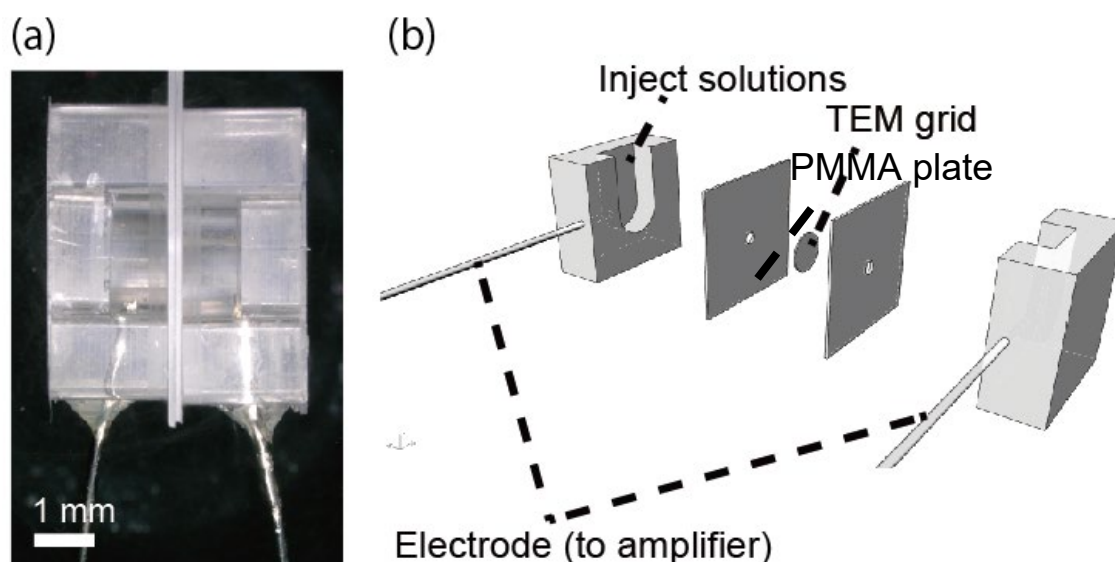

**Figure S1.** A PDMS device for current measurements of a carbon film-coated TEM grid with a nanopore. (a) A photograph of the top view of the device. (b) A schematic illustration of the device. A TEM grid and PMMA plates are sandwiched between PDMS chambers into which Ag/AgCl reference electrodes are incorporated.

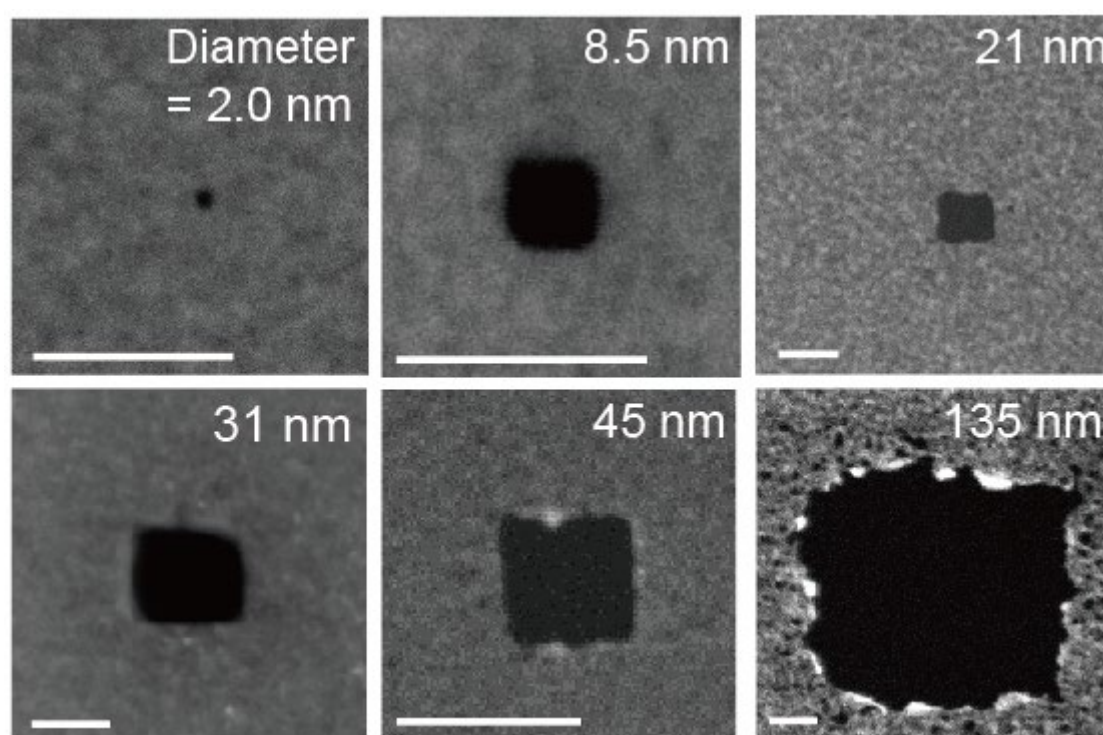

**Figure S2.** STEM-HAADF images of the fabricated nanopores at the carbon membrane. Scale bars are 20 nm.

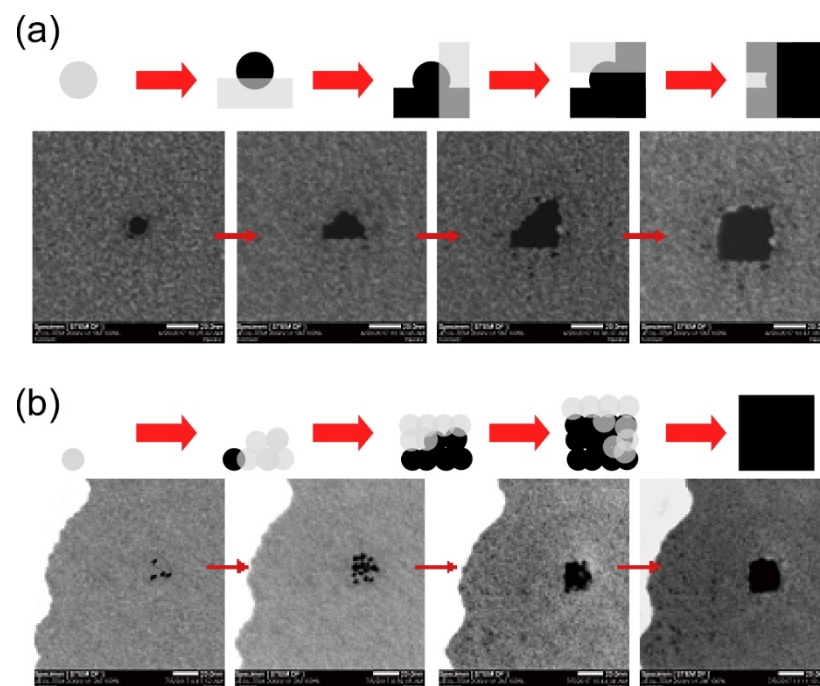

**Figure S3.** Scanning patterns of the focused electron beam and TEM images of carbon membranes. (a) Initially irradiated to form a small pore and further irradiated around the small pore to form the larger nanopore. (b) Irradiated many adjacent small pores to ultimately form a large square nanopore. The scale bars indicate 20 nm.

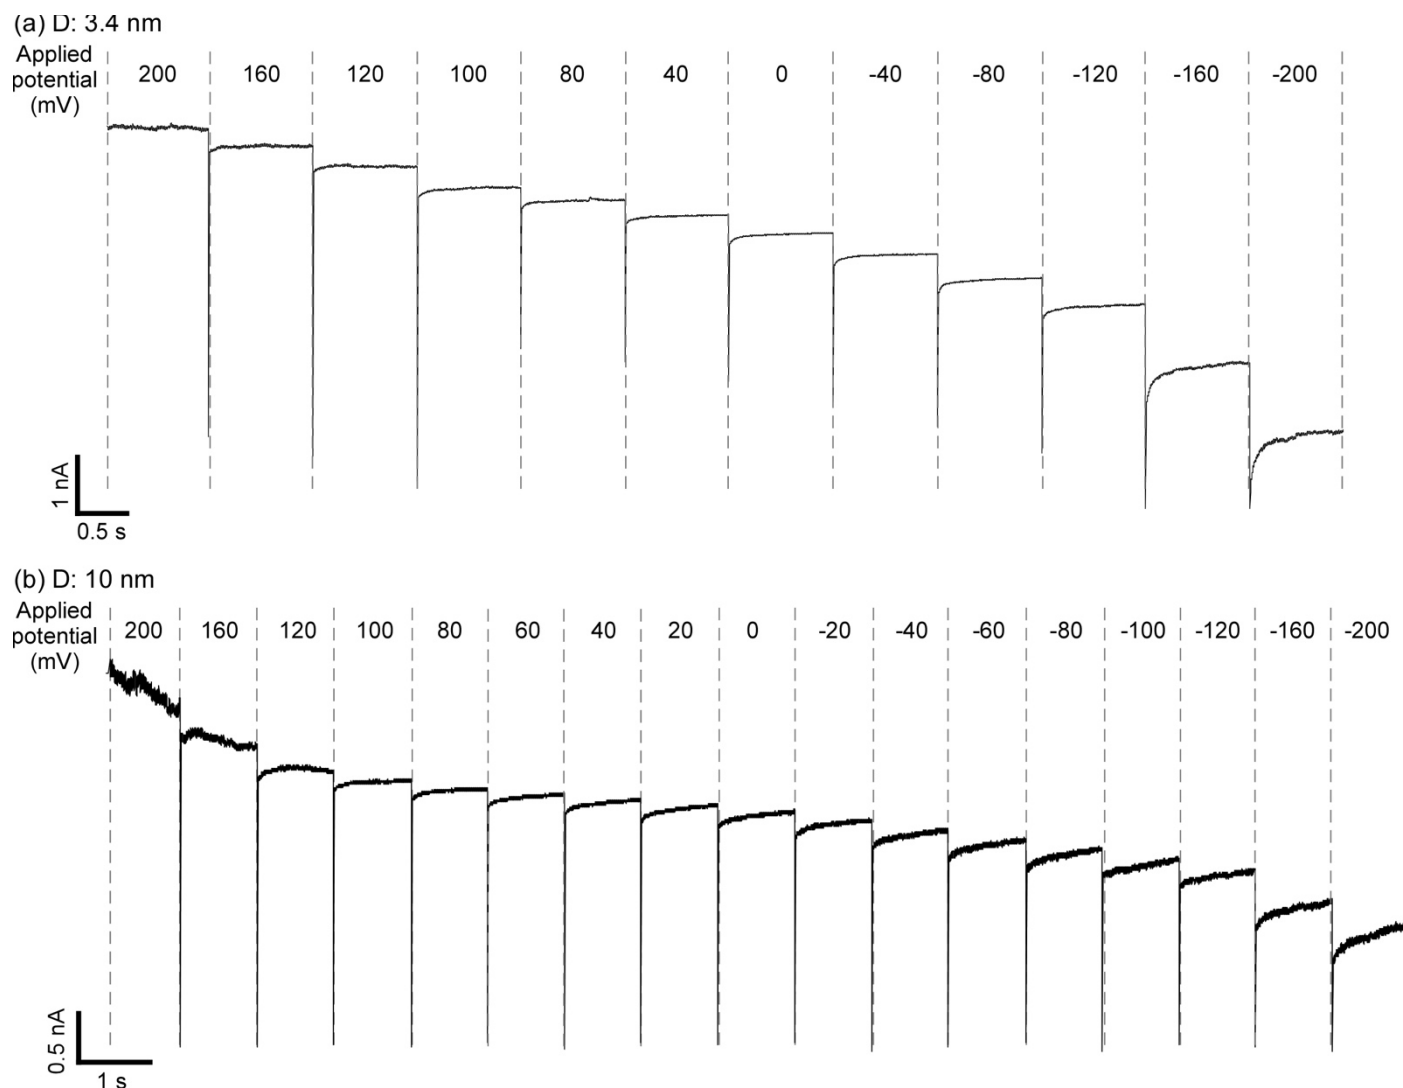

**Figure S4.** Raw current data of TEM nanopores for IV curve measurements. When the absolute values of applied potentials are larger than 100 mV, the current noise became larger.

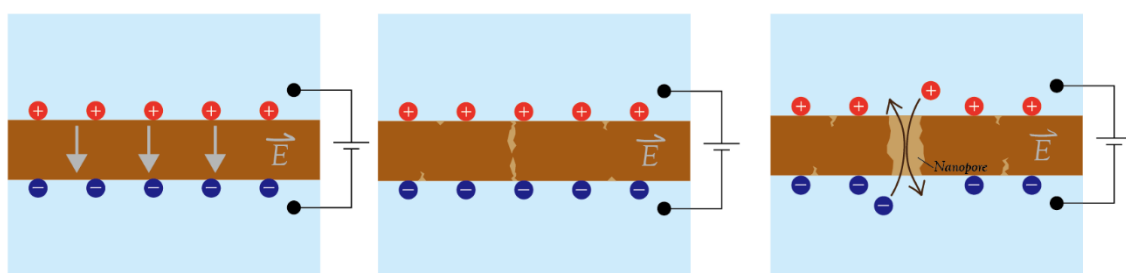

**Figure S5.** Mechanism of the dielectric breakdown. Ions accumulate at the surface of the membrane when a high voltage is applied, resulting in defect formation. One of the defects subsequently grows to form a through-hole of nanometer size.

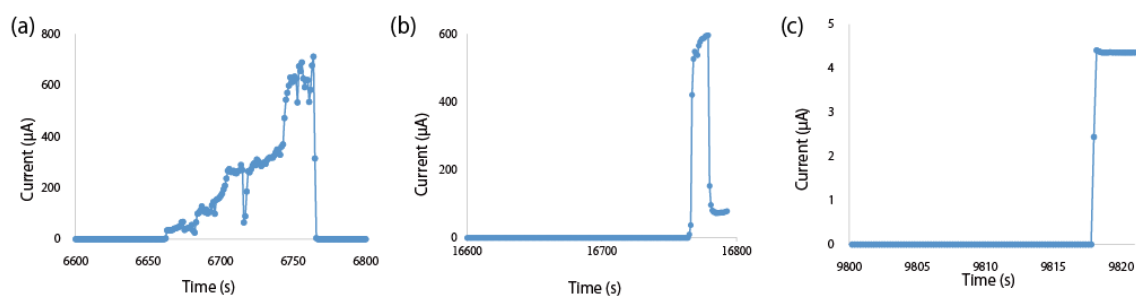

**Figure S6.** Typical results on the three different conditions of the dielectric breakdown experiment. (a) [KCl] = 2 M, Voltage = 10 V, pH (cis/trans) = (0/0), Membrane thickness = 10 nm. The typical result shows that the current gradually increases and returns to 0. (b) [KCl] = 2 M, Voltage = 10 V, pH (cis/trans) = (0/0), Membrane thickness = 10 nm. The typical result shows that the current suddenly increases and decreases. (c) [KCl] = 2 M, Voltage = 10 V, pH (cis/trans) = (0.5/13), Membrane thickness = 10 nm. The typical result shows that the current suddenly increases and plateaus.

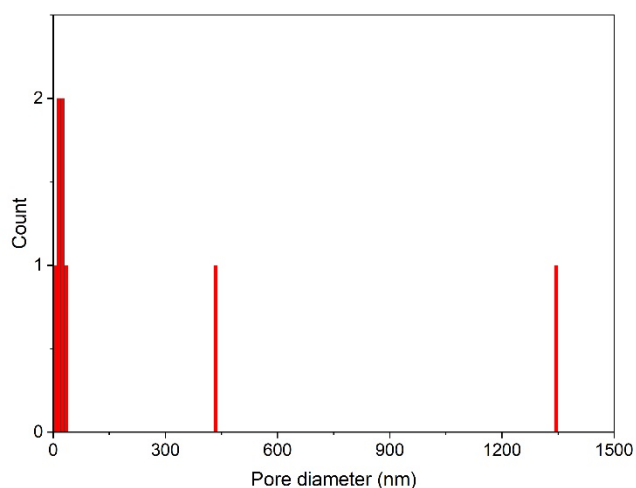

**Figure S7.** A histogram of the pore diameter of nanopores fabricated by the DB method. The pore diameters were mostly less than 40 nm.
